# Supplementary material
Source: PubMed Central journal article supplement (PMC5210235)
Supplement: 2016_149765-Disclosures_and_Contributions.pdf [file 2016_149765-Disclosures_and_Contributions.pdf]

Haematologica  
HAEMATOL/2016/149765  
Version 3

An accurate, simple prognostic model consisting of age, JAK2, CALR,  
and MPL mutation status for patients with primary myelofibrosis

Uri Rozovski, Srdan Verstovsek, Taghi Manshouri, Vilma Dembitz,  
Ksenija Bozinovic, Kate Newberry, Ying Zhang, Joseph E. Bove,  
Sherry Pierce, Hagop Kantarjian, and Zeev Estrov

Disclosures: This study was supported by the NIH/NCI under award number P30  
CA016672.

Contributions: U.R. designed the study, analyzed the data and drafted the manuscript.  
S.V., T.M., V.D., K.B., Y.Z., J.B. performed the experiments. S.P. provided the clinical  
information and analyzed the data. K.N. participated in drafting the manuscript. H.K. helped  
in designing the study and the statistical analysis. Z.E. conceived and designed the study  
and drafted the manuscript.
